# Supplementary material for: A planar C3Ca2 film: a novel 2p Dirac half metal
Source: Royal Society of Chemistry journal article supplement (doi:10.1039/c7tc02700a), 2017-01-01
Supplement: c7tc02700a1.pdf [file c7tc02700a1.pdf]

## Supplementary Information:

### Planar film $C_3Ca_2$ : A novel 2p Dirac half metal

Wei-xiao Ji,\* Bao-min Zhang, Shu-feng Zhang, Chang-wen Zhang,\*\*

Meng Ding, Ping Li and Pei-ji Wang

School of Physics and Technology, University of Jinan,  
Jinan, Shandong, 250022, P. R. China

\* hellojiweixiao@163.com

\*\* zhchwsd@163.com

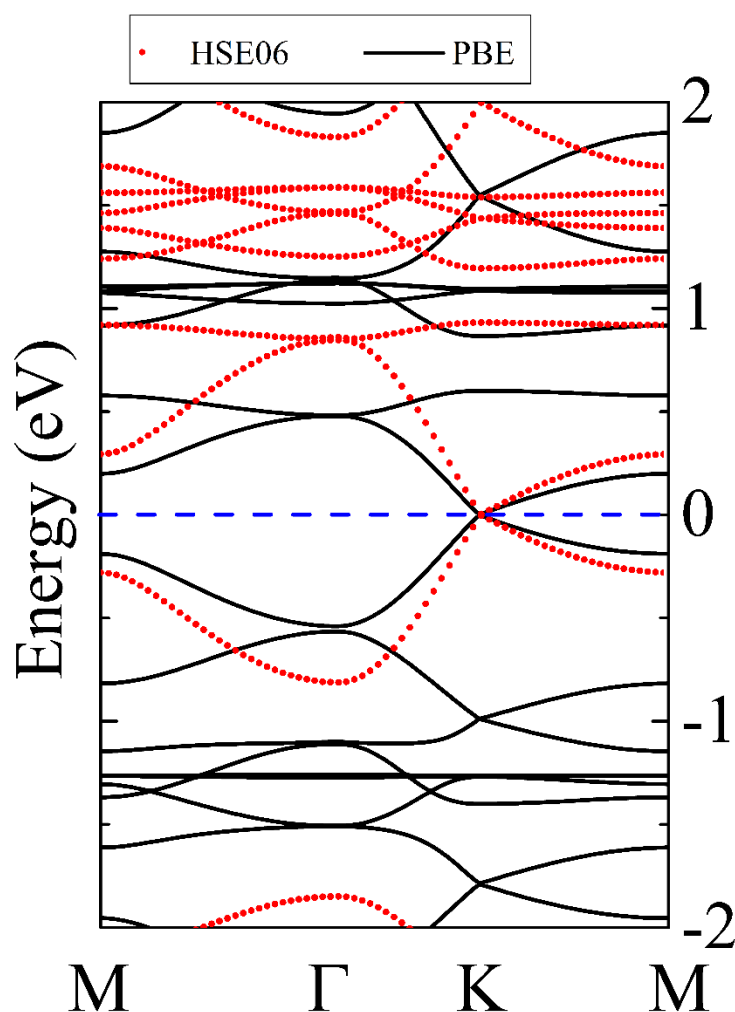

Figure S1 Comparison of band structures from PBE(black lines) and HSE06(red dots) calculations.

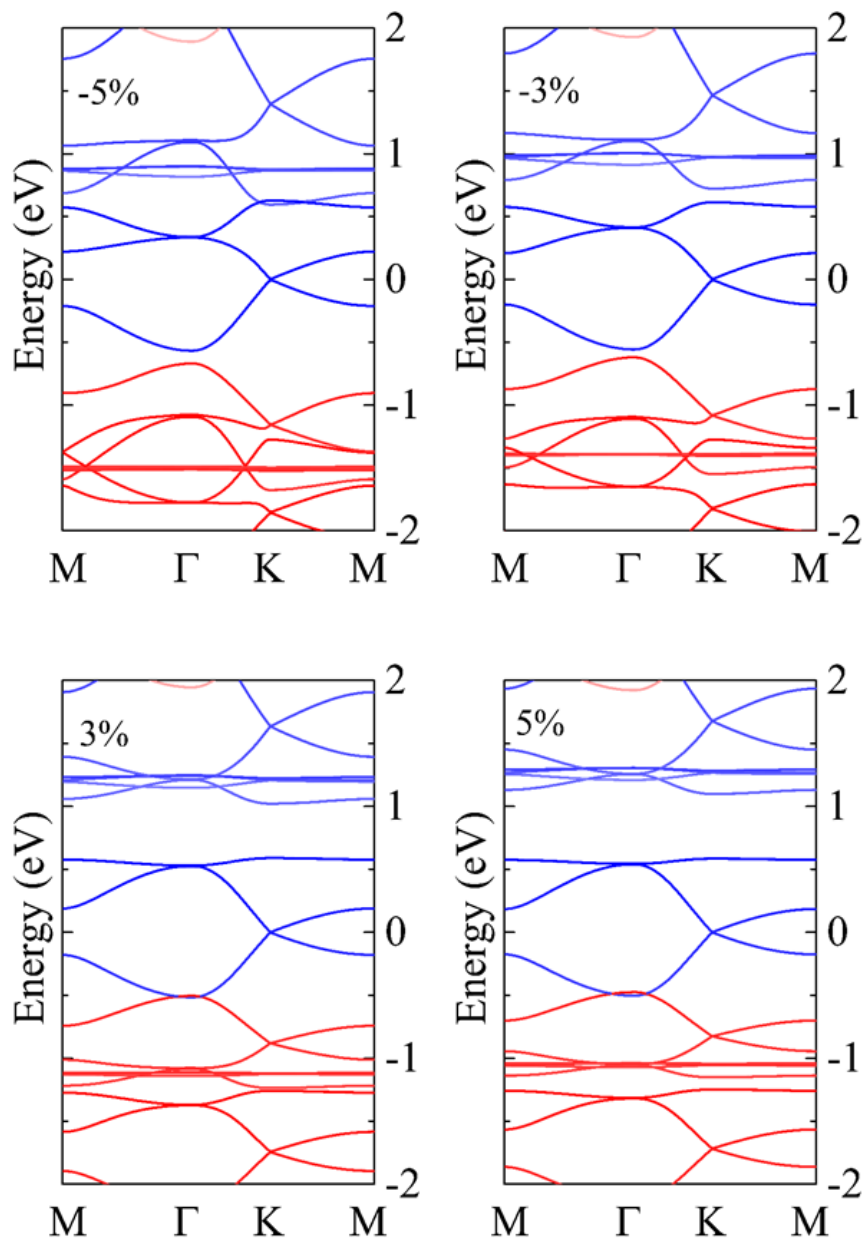

Figure S2 Spin-resolved band structure of  $C_3Ca_2$  under mild biaxial tensile and compressional strains ( $\pm 3\% \sim \pm 5\%$ ), from which the maintenance of Dirac half metal characteristic persists. The red and blue lines represent the spin up and down channel respectively.
